# Supplementary material
Source: Springer Nature journal article supplement (https://www.springermedizin.de/resource/supplementary/12874_2005_142_MOESM2_ESM.pdf/9433854)

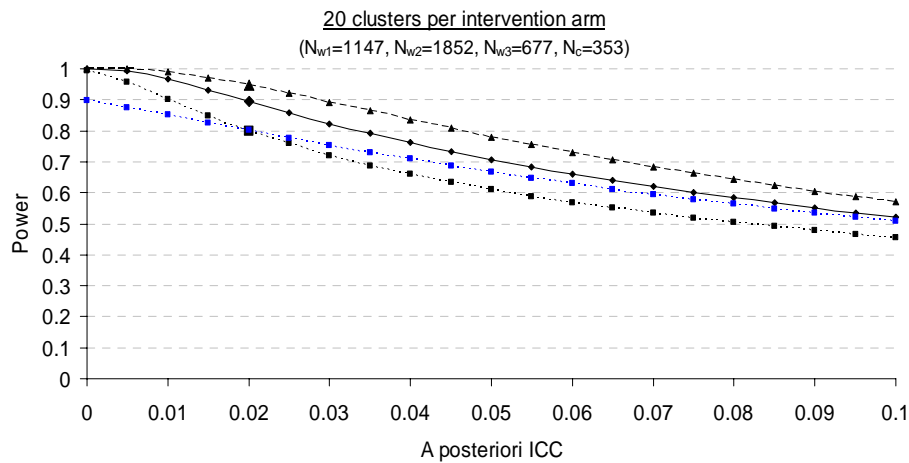

—◆— Equal weights ( $N_{w1}$ )  
 -.-■-.- Minimum variance weights ( $N_{w3}$ )

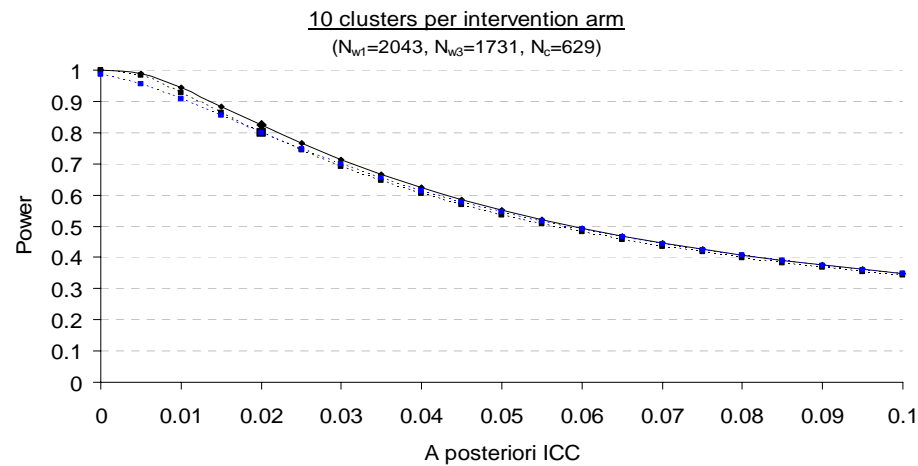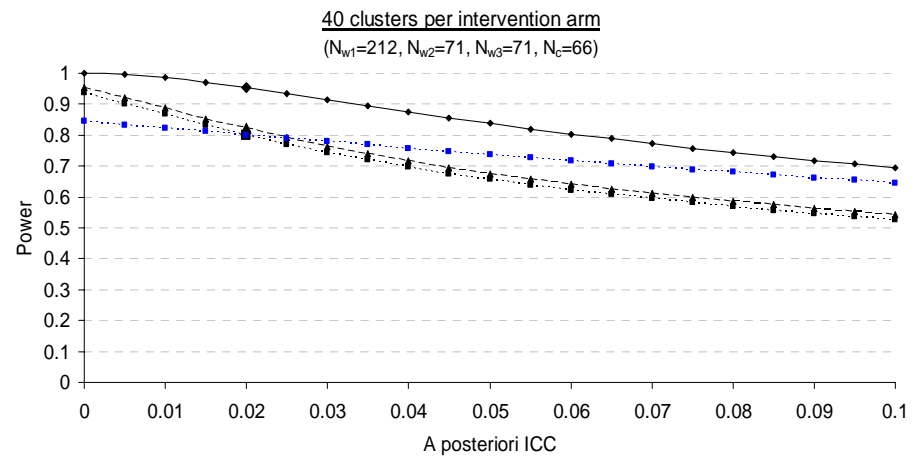

-.-▲-.- Cluster size weights ( $N_{w2}$ )  
 -.-■-.- Ref: constant size ( $N_c$ )

Supplement: MOESM2 [file 9433854]
